# Supplementary material for: The string decomposition problem and its applications to centromere analysis and assembly
Source: PubMed Central journal article supplement — Bioinformatics. 2020 Jul 13;36(Suppl 1):i93–i101. doi: 10.1093/bioinformatics/btaa454 (PMC7428072; doi:10.1093/bioinformatics/btaa454), 2020-07-13
Supplement: btaa454_spplementary_data.pdf [file btaa454_spplementary_data.pdf]

# Supplementary Materials for “The String Decomposition Problem and its Applications to Centromere Analysis and Assembly”

## Appendices

- Uniqueness of the solution of the String Decomposition Problem
- SD implementation details
- Identification of reliable monomers
- Processing gaps in the monomer alignments
- Benchmarking string decomposition tools
- Benchmarking NCRF
- cenX monomers
- Generating accurate read alignments to cenX
- Errors in monoread-to-monocentromere alignments
- Detailed analysis of errors in string decomposition
- Most frequent human monomers
- Most frequent human HORs

## Appendix: Uniqueness of the solution of the String Decomposition Problem

Backtracking from one of the sinks to the source in the String Decomposition Graph reveals the sequence of block-switching edges in the backtracking path and thus provides a solution of the String Decomposition Problem (each block-switching edge is labeled by the corresponding block). To check if this solution is unique we modify the standard backtracking procedure in sequence alignment (that arbitrarily selects a single backtracking path (Compeau and Pevzner, 2013)) by constructing the *backtracking graph* that contains all edges traversed by all backtracking paths from one of the sinks to the source. Two vertices in the backtracking graph are called *close* if there is a path between them that does not contain block-switching edges. We form the *block-switching graph* by gluing all close vertices in the backtracking graph and collapsing parallel identically labeled block-switching edges into a single edge. The String Decomposition Problem has a unique solution if the block-switching graph represents a single path.

## Appendix: SD implementation details

**run\_decomposer.py script.** StringDecomposer is publicly available at <https://github.com/ablab/stringdecomposer>. The “run\_decomposer.py” script accepts the following two files in fasta format as the Input: (i) a file containing the read-set or a genomic

sequence, and (ii) a file containing monomer sequences. It runs the SD algorithm (implemented in C++) and converts the alignment scores of individual monomers into percent identities using the Edlib library (Šošić and Šikic, 2017). The default indel and mismatch penalties for indel are equal to 1 but the “run,decomposer.py” script allows one to assign arbitrary user-defined penalties. StringDecomposer saves the monomer alignments to a given read-set (or a genomic sequence) in the tsv-format. To generate the string decomposition described in the Results section commit 6fc0b4a64 was used.

**SD parallelization.** The String Decomposition Graph becomes rather large in the case when the string  $R$  is long (e.g., when  $R$  is an ultralong read or an assembly of an entire centromere) or when the block-set is large, leading to a large memory footprint. To reduce the memory footprint, we represent the string  $R$  as a set of overlapping segments of length  $SegmentLength$  with default value  $SegmentLength = 5500$  bp (the last segment can be shorter) so that the consecutive segments overlap by  $Overlap$  nucleotide (Figure S1). The default value  $Overlap$  (500 bp) is chosen to be larger than the monomer size and to ensure that each monomer is positioned fully inside at least one segment. Afterward, each segment of the read is processed separately and all segments are “glued” together.

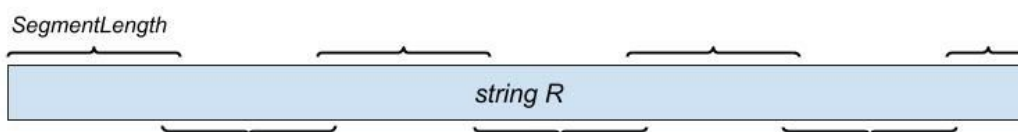

Fig. S1. Partitioning a read into overlapping segments.

## Appendix: Identification of reliable monomers

In order to distinguish false monomer alignments (denoted by the gap-symbol “?”) from the true monomer alignments, we trained a logistic regression model with two features defined for each monomer-to-sequence alignment: 1) the identity score  $TopIdentity$  of the highest-scoring monomer, and 2) the difference  $IdentityDiff$  between  $TopIdentity$  and the identity of the second-highest scoring monomer. The simplest *baseline* logistic regression model makes a decision solely on the  $TopIdentity$  value, i.e, classifies a monomer as reliable if  $TopIdentity$  exceeds a threshold  $MinTopIdentity$ . Below we demonstrate the logistic regression model with two predictors ( $TopIdentity$  and  $IdentityDiff$ ) improves on the baseline one-predictor logistic regression model.

In order to train both models, we selected 1,000 ONT reads that were mapped to cenX by tandemQUAST (further referred as the CENX read-set) and 1,000 ONT reads from the same rel3 CHM13 dataset mapped to non-centromeric regions of chromosome X T2T assembly v0.7 with minimap2 (further referred as the NOTCENX read-set). Centromeric reads containing the LINE element were excluded from the CENX set. Only reads with alignment identity exceeding 80% and the fraction of aligned sequence exceeding 90% were included in the NOTCENX set. We attempted to decompose each read from CENX and NOTCENX into the monomer alphabet. The training dataset  $TrainSet$  is constructed from 80% of CENX and NOTCENX reads. The test dataset  $TestSet$  is constructed from the remaining 20% of CENX and NOTCENX reads. Both baseline and two-predictor logistic regression models were trained on  $TrainSet$ .

The optimal *MinTopIdentity* threshold identified with the baseline model on the *TrainSet* is 67.7%. At this threshold, the baseline model produces 0 false-positive and 241 false-negative alignments out of 65,842 monomer alignments in *TestSet* (false-positive rate is 0%, false-negative rate is 0.37%). The two-predictor model showed superior results: 0 false positive and 198 false negative alignments out of the same 65,842 monomer alignments in *TestSet* (false-positive rate is 0%, false-negative rate is 0.30%). Figure S2 illustrates the results of the classification produced by the baseline and the two-predictor regression models.

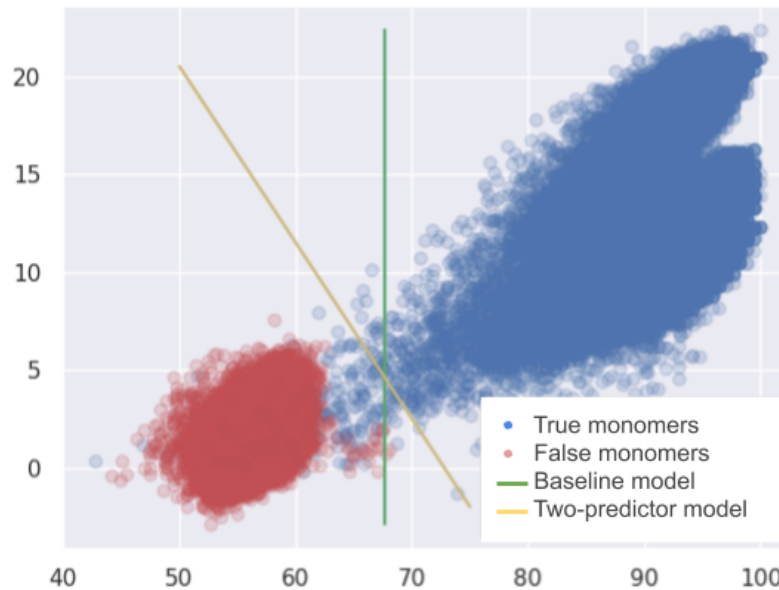

**Fig. S2. The distribution of *TopIdentity* (x-axis) and *IdentityDiff* (y-axis) for monomer alignments in centromeric and non-centromeric regions.** Each dot in the graph represents either a true monomer alignment that belongs to the centromeric region (blue dots) or false monomer alignment (red dots). The green line separates true and false monomers according to baseline classifier based on *TopIdentity* value of each alignment, while the yellow line separates the true and false monomers alignments according to the logistic regression trained on both *TopIdentity* and *IdentityDiff* values.

## Appendix: Processing gaps in the monomer alignments

Some reads are translated into monoreads with gaps represented by the “?” symbols that reveal regions of low identity to all monomers. The SD algorithm generates a read decomposition where each position is covered by a monomer and replaces all unreliable monomers by the “?” symbol in the monoread. However, the number of the predicted “?” symbols in a monoread is not necessarily an accurate approximation of the total length of non-monomeric positions in a read. Additionally, the AC algorithm produces a decomposition that does not cover all positions of a read, resulting in *non-covered* positions in the AC monomer decomposition, with no monomer alignment covering these positions.

We thus modified a transformation of a read  $R$  into a monoread  $mono(R)$  by replacing a run of non-covered positions of length  $L$  by a run of the gap symbol “?” with length  $L/MonomerLength$ , where *MonomerLength* is the average length of monomers.

## Appendix: Benchmarking string decomposition tools

**Alpha-CENTAURI.** Alpha-CENTAURI v.0.2 was run with default parameters. While HMMer search from the first stage of the Alpha-CENTAURI algorithm (partitioning a read into consequent monomers locations) was successful, the second stage (monomer sequences clustering and monomer identification) did not generate a precise read decomposition into monomers, reporting many abnormal HORs alignments, and was removed from further analysis.

**TandemRepeatsFinder.** TRF 4.09 version was run with recommended parameters for human genome (<https://tandem.bu.edu/trf/trf.whatnew.html>). Though TRF has identified the correct monomer length (~170 bp) in all centromeric reads, its output is difficult to use for further analysis. In particular, it is not clear how to identify monomers from the putative positions identified by TRFs as these positions are often shifted. For example a read *bcc5e5d2-f12f-4b59-b952-bd10f81ac89f* in rel2 T2T dataset is fully covered by DXZ1\* monomers both according to SD and TRF, but TRF alignments positions have a 40 bp shift with respect to SD positions, making it difficult to identify monomers with high identity scores. In contrast, TRF identified a rather small shift (~10-15 bp) in a read *c500a3b1-f00c-40c1-94af-e33bae40ca71*, resulting in a successful prediction of monomers from the TRF alignments.

**NCRF.** We launched NCRF v1.01.02 to search for repeats of DXZ1\* with parameters “--scoring=nanopore --minlength=5000”. Appendix “Benchmarking NCRF” analyzes NCRF results using monomer-free metrics and compares it with other string decomposition approaches.

## Appendix: Benchmarking NCRF

We compared NCRF with the AC and SD approaches using the dataset *Reads* defined in the Results section and analyzing two monomer-free metrics:

- *read coverage*, the fraction of reads’ length partitioned into monomers for (AC and SD approaches) or covered by the DXZ1\* HOR (NCRF approach).
- *percentage of unaligned segments*. Two consecutive aligned monomers in a read are separated by an unaligned segment if the distance from the end of the first monomer alignment to the start of the second monomer alignment exceeds *MinUnalignedLength* (default value *MinUnalignedLength*=10 bp). Since NCRF reports HORs without spaces in the alignment, it has 0 unaligned segments.

Table S1 illustrates that NCRF has lower *read coverage* than the SD and AC approaches but improves on these approaches with respect to the number of unaligned segments.

| Approach | read coverage (%) | % unaligned segments<br>(#unaligned segments / #monomers) |
|----------|-------------------|-----------------------------------------------------------|
|----------|-------------------|-----------------------------------------------------------|

|      |    |      |
|------|----|------|
| AC   | 98 | 2.95 |
| NCRF | 92 | 0    |
| SD   | 99 | 0.14 |

**Table S1. Monomer-free metrics for the AC, NCRF and SD tools.**

## Appendix: cenX monomers

In order to extract twelve monomer sequences we launched “chop,to,monomers.py” script from Alpha-CENTAURI v.0.2G on the consensus monomer HMM (<https://github.com/volkansevim/alpha-CENTAURI/blob/master/example/alpha.hmm>) and a concatenation of two DXZ1\* sequences derived in Bzikadze and Pevzner, 2019. The twelve cenX monomers are derived from the Alpha-CENTAURI output. The twelve monomers forming cenX HOR monomers are usually reported as CDEABCDEABCD since this sequence of monomers reflects the ancestral pentamer structure (CDEAB) of the HOR from which cenX HOR (DXZ1) originated. Since this representation is inconvenient for analyzing string decomposition of cenX, we instead represent DXZ1 as ABCDEFGHIKL.

## Appendix: Generating accurate read alignments to cenX

In order to generate a set of accurate alignments, positions of alignments generated by the TandemMapper tool (Mikheenko et al., 2020) were compared to the positions of read alignments in the cenX assembly generated by centroFlye. It turned out that some TandemMapper alignments differ from centroFlye alignments. This is likely caused either by an incorrect mapping of some reads to centromere (generated by TandemMapper) or by an erroneous recruitment of non-cenX reads to cenX (provided by centroFlye). We thus filtered out reads with differing starting positions (by more than 2 kbp) of TandemMapper and centroFlye alignments, resulting in 1442 read alignments.

## Appendix: Errors in monoread-to-monocentromere alignments

1            2            3    4            5            6    7  
GHI?KLABCDE-GHIJFGHIJFLHIJKLABCDEFGHIJKLABCDE??IJF-GHIJKL  
GHIJKLABCDEFGHIJFGHIJKLHI?KLABCDE-GHIJKLABCDE?-IJF?GHIJKL

**Fig. S3. Monoread-to-monocentromere alignments.** The first row represents *mono(origin(Read))*, the second row represents *mono(Read)*. The matching positions are shown in black and positions with errors are shown in red. The following types of errors are shown: gap-monomer mismatch (1), monomer-insertion (2), monomer-monomer mismatch (3), monomer-gap mismatch (4), monomer-deletion (5), gap-deletion (6), gap-insertion (7).

## Appendix: Detailed analysis of errors in string decomposition

Most alignment errors between monoreads and monocentromere for both SD and AC approaches occur due to inconsistencies between (inaccurate) reads and (accurate) centromere assembly.

Since 91% of mismatches for the AC approach are *monomer-gap mismatches* (Table 1), we analyzed monomers predicted by SD but missed by AC. All SD monomer alignments that have overlap longer than 100 bp with some gap symbol (“?”) output by AC were considered. All monomer predicted by SD were divided into three groups: (i) the highest-scoring monomer is a true monomer, (ii) the second highest-scoring monomer is a true monomer, and (iii) none of the two highest-scoring monomers is a true monomer. Figure S4 presents the scatter-plot of the scores of the highest-scoring and the second highest-scoring monomers for each group (left) and the distribution of their differences (right). All alignments have relatively low identity (below 85%) as compared to the average identity of all monomers (93%). However, the highest-scoring monomer is correct in ~99% of cases and the difference in identity between the highest-scoring and the second-highest scoring monomers is rather substantial (more than 4% in most cases). Both the highest-scoring and the second-highest scoring monomers are incorrect in approximately 0.3% of cases.

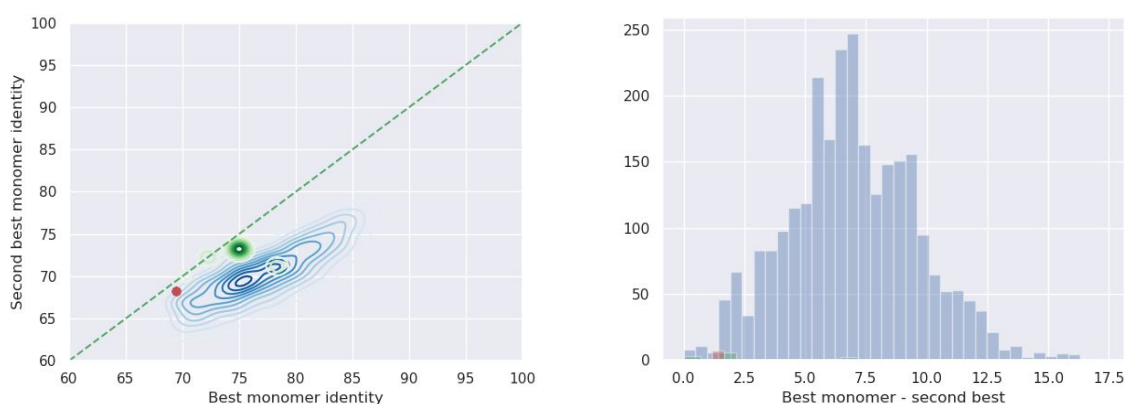

**Fig. S4. Statistics of scores for monomers that the AC approach failed to predict.** (Left) Analysis of underpredicted monomers that were classified as monomer-gap mismatches: the scatter-plot of the highest monomer score and the second-highest monomer score for three cases: the highest-scoring monomer is correct (blue), the second highest-scoring monomer is correct (green), neither the highest-scoring nor the second highest-scoring monomer is correct (red). The intensity of the color reflects the number of points with such identity values. (Right) Distribution of differences between the identity of the highest-scoring and the second highest-scoring monomers.

SD and AC made 18 (20) gap-insertions, 0(6) monomer-insertions, and 117 (154) monomer-deletions. Most such errors arise in corrupted regions of reads with low alignment quality — the identities of flanking monomers located next to such regions usually falls below 80%. AC has more insertions (deletions) than SD, as the run of “?” identified by AC are sometimes longer (shorter) than the correct number of monomers in the run.

## Appendix: Most frequent human monomers

It turned out that 21 out of 965 monomers in the set *AllMonomers* do not appear in any monoreads. Figure S5 presents the histogram of frequencies of the remaining 965-21=944 monomers. Table S2 presents frequencies of 100 most frequent monomers in the set *MonoReads*.

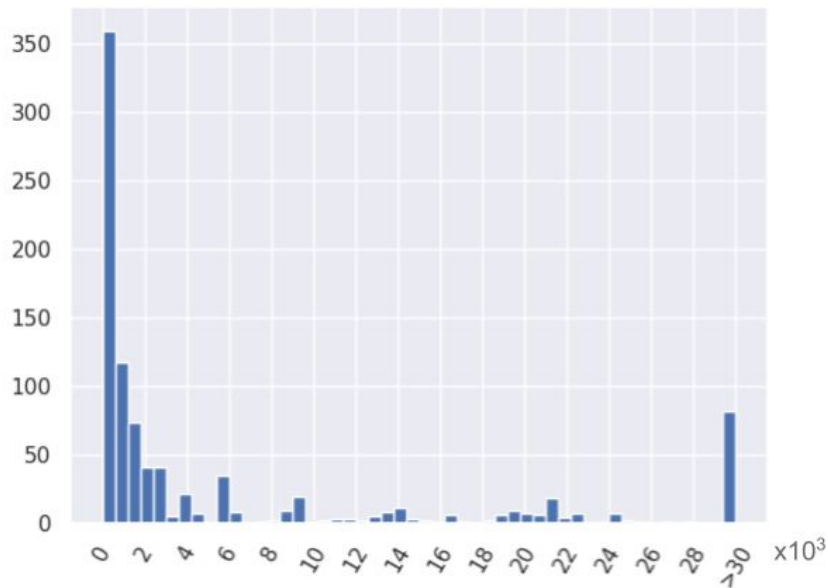

**Fig. S5. Histogram of frequencies 944 monomers with non-zero frequencies in the set *MonoReads*.** The x-axis shows the monomer frequency (in thousands) and the height of each bar represents the number of monomers with this frequency (The bin size is 50).

| Monomer | Frequency |
|---------|-----------|---------|-----------|---------|-----------|---------|-----------|---------|-----------|
| 1       | 314720    | 21      | 49294     | 41      | 36522     | 61      | 35598     | 81      | 29801     |
| 2       | 229898    | 22      | 46100     | 42      | 36519     | 62      | 35555     | 82      | 29718     |
| 3       | 93658     | 23      | 45628     | 43      | 36509     | 63      | 35344     | 83      | 27612     |
| 4       | 93124     | 24      | 43689     | 44      | 36480     | 64      | 34449     | 84      | 26599     |
| 5       | 92475     | 25      | 42939     | 45      | 36474     | 65      | 34059     | 85      | 25583     |
| 6       | 92044     | 26      | 42093     | 46      | 36435     | 66      | 34054     | 86      | 25148     |
| 7       | 90964     | 27      | 38588     | 47      | 36414     | 67      | 34005     | 87      | 24961     |
| 8       | 90839     | 28      | 38582     | 48      | 36098     | 68      | 33513     | 88      | 24563     |
| 9       | 81976     | 29      | 38575     | 49      | 35970     | 69      | 33485     | 89      | 24521     |
| 10      | 81947     | 30      | 38545     | 50      | 35967     | 70      | 33436     | 90      | 24486     |
| 11      | 81169     | 31      | 38463     | 51      | 35932     | 71      | 33393     | 91      | 24485     |
| 12      | 81155     | 32      | 38461     | 52      | 35903     | 72      | 33264     | 92      | 24286     |
| 13      | 81126     | 33      | 37400     | 53      | 35862     | 73      | 33148     | 93      | 24177     |
| 14      | 80986     | 34      | 37321     | 54      | 35763     | 74      | 32778     | 94      | 24167     |
| 15      | 80885     | 35      | 36794     | 55      | 35722     | 75      | 31031     | 95      | 23505     |
| 16      | 80768     | 36      | 36754     | 56      | 35717     | 76      | 30763     | 96      | 22792     |
| 17      | 64762     | 37      | 36746     | 57      | 35708     | 77      | 30452     | 97      | 22786     |
| 18      | 59226     | 38      | 36731     | 58      | 35674     | 78      | 29971     | 98      | 22727     |
| 19      | 58511     | 39      | 36567     | 59      | 35672     | 79      | 29954     | 99      | 22724     |
| 20      | 51012     | 40      | 36529     | 60      | 35612     | 80      | 29807     | 100     | 22642     |

**Table S2. Frequencies of 100 most frequent monomers in the set *MonoReads*.** The total number of identified monomers is 7,577,262. 40 monomers have frequency below 10, and 9 of them have frequency 1. 33 monomers out of 40 have very low average alignment identity (below 75%).



## Appendix: Most frequent putative human HORs

Table S3 presents information about 100 most frequent HORs in the set *MonoReads*.

| ID | Size | HOR                                                                       | TandemCount | Count  |
|----|------|---------------------------------------------------------------------------|-------------|--------|
| 1  | 2    | _1_2_                                                                     | 179339      | 214076 |
| 2  | 6    | _3_4_6_8_7_5_                                                             | 67874       | 80205  |
| 3  | 8    | _10_9_12_11_16_15_14_13_                                                  | 59607       | 71244  |
| 4  | 4    | _1_24_25_17_                                                              | 23364       | 39748  |
| 5  | 12   | _37_41_42_44_39_47_45_46_38_35_40_43_                                     | 22503       | 29704  |
| 6  | 5    | _89_88_91_93_90_                                                          | 20409       | 22634  |
| 7  | 7    | _18_30_27_28_29_32_31_                                                    | 14466       | 29166  |
| 8  | 16   | _71_63_55_59_56_52_53_60_26_50_61_57_62_49_36_48_                         | 14265       | 22005  |
| 9  | 12   | _21_81_80_82_21_66_64_67_65_51_54_58_                                     | 10094       | 14085  |
| 10 | 4    | _185_193_191_19_                                                          | 8548        | 11074  |
| 11 | 10   | _72_73_20_1_20_78_79_74_77_76_                                            | 7259        | 11546  |
| 12 | 11   | _129_128_126_18_30_27_28_29_32_31_18_                                     | 6764        | 12111  |
| 13 | 16   | _157_141_142_19_145_139_140_136_143_19_146_149_148_147_96_137_            | 6325        | 10308  |
| 14 | 17   | _175_174_177_179_178_183_184_182_181_171_170_169_172_173_180_186_176_     | 5531        | 8855   |
| 15 | 8    | _187_190_188_200_194_192_195_197_                                         | 5447        | 8225   |
| 16 | 8    | _152_154_153_151_150_69_70_68_                                            | 5092        | 10522  |
| 17 | 18   | _114_116_127_166_164_165_123_111_121_119_125_124_117_115_120_108_109_110_ | 5003        | 8525   |
| 18 | 13   | _210_207_216_214_209_212_203_202_213_196_222_206_204_                     | 4996        | 6952   |
| 19 | 10   | _73_2_1_20_78_79_74_77_76_72_                                             | 4939        | 7454   |
| 20 | 7    | _68_135_132_131_167_69_70_                                                | 4937        | 8377   |
| 21 | 10   | _228_229_231_230_225_223_226_227_224_234_                                 | 4569        | 5818   |
| 22 | 19   | _107_22_92_95_85_22_130_113_101_112_122_134_102_98_97_106_105_87_86_      | 4154        | 7493   |
| 23 | 8    | _260_269_268_267_276_238_244_242_                                         | 3993        | 4745   |
| 24 | 12   | _51_54_58_21_81_80_82_163_66_64_67_65_                                    | 3749        | 6270   |
| 25 | 12   | _1_2_1_2_103_17_34_33_1_2_1_2_                                            | 3508        | 8300   |
| 26 | 15   | _123_111_121_119_125_124_117_115_120_108_109_110_114_116_127_             | 3278        | 7498   |
| 27 | 11   | _252_249_232_248_261_263_266_264_262_239_251_                             | 3047        | 4194   |
| 28 | 14   | _257_258_241_254_265_270_274_237_275_236_272_259_26_253_                  | 3015        | 4213   |
| 29 | 8    | _163_66_64_67_65_51_54_58_                                                | 2959        | 4300   |
| 30 | 11   | _286_281_283_287_273_285_243_246_245_250_247_                             | 2578        | 3282   |
| 31 | 4    | _23_75_144_155_                                                           | 2285        | 9293   |



|    |    |                                                                   |      |       |
|----|----|-------------------------------------------------------------------|------|-------|
| 32 | 11 | _152_154_153_151_150_69_70_68_135_132_131_                        | 2239 | 3626  |
| 33 | 6  | _199_94_99_138_133_118_                                           | 2199 | 6213  |
| 34 | 10 | _1_2_1_2_103_17_34_33_1_2_                                        | 2097 | 6054  |
| 35 | 15 | _23_168_84_83_23_75_84_83_162_158_156_23_75_144_155_              | 2013 | 3651  |
| 36 | 14 | _94_99_138_133_118_199_94_99_138_133_118_198_201_189_             | 1966 | 3696  |
| 37 | 18 | _18_30_27_28_29_32_31_18_129_128_126_18_30_27_28_29_32_31_        | 1903 | 4804  |
| 38 | 8  | _94_99_138_133_118_198_201_189_                                   | 1748 | 4567  |
| 39 | 2  | _104_104_                                                         | 1662 | 5784  |
| 40 | 4  | _5_3_4_6_                                                         | 1617 | 7557  |
| 41 | 4  | _8_7_5_3_                                                         | 1369 | 10281 |
| 42 | 15 | _152_154_153_151_150_69_70_68_135_132_131_167_69_70_68_           | 1357 | 2589  |
| 43 | 14 | _1_2_1_2_103_17_34_33_1_2_1_2_1_2_                                | 1280 | 3656  |
| 44 | 11 | _84_83_162_158_156_23_75_144_155_23_168_                          | 1210 | 2163  |
| 45 | 10 | _315_317_316_312_310_308_418_311_313_314_                         | 1173 | 1456  |
| 46 | 15 | _215_217_211_220_218_221_219_205_159_161_160_278_159_161_160_     | 1170 | 2062  |
| 47 | 11 | _215_217_211_220_218_221_219_205_159_161_160_                     | 1168 | 3171  |
| 48 | 16 | _1_24_25_17_1_24_25_17_34_33_1_100_1_24_25_17_                    | 1160 | 2645  |
| 49 | 8  | _1_2_103_17_34_33_1_2_                                            | 1141 | 4138  |
| 50 | 12 | _1_24_25_17_34_33_1_100_1_24_25_17_                               | 1130 | 3227  |
| 51 | 15 | _159_161_160_19_159_161_160_215_217_211_220_218_221_219_205_      | 1107 | 1722  |
| 52 | 10 | _8_7_5_3_4_6_8_7_5_3_                                             | 1030 | 6550  |
| 53 | 16 | _343_369_370_347_346_328_348_342_341_352_349_350_351_345_340_344_ | 1007 | 1579  |
| 54 | 15 | _240_366_362_356_309_358_361_364_355_354_357_360_353_365_240_     | 972  | 1527  |
| 55 | 8  | _24_25_17_34_33_1_100_1_                                          | 937  | 2774  |
| 56 | 2  | _96_137_                                                          | 928  | 3669  |
| 57 | 10 | _308_459_311_313_314_315_317_316_312_310_                         | 885  | 1106  |
| 58 | 16 | _141_142_19_145_139_140_136_143_19_146_149_148_147_96_137_96_     | 860  | 1416  |
| 59 | 4  | _21_81_80_82_                                                     | 848  | 4110  |
| 60 | 2  | _10_9_                                                            | 825  | 4800  |
| 61 | 16 | _1_2_1_2_1_2_1_2_103_17_34_33_1_2_1_2_                            | 805  | 2058  |
| 62 | 10 | _5_3_4_6_8_7_5_3_4_6_                                             | 797  | 4054  |
| 63 | 10 | _225_223_226_227_224_454_228_229_231_230_                         | 783  | 1106  |
| 64 | 4  | _51_54_58_21_                                                     | 728  | 3055  |
| 65 | 16 | _8_7_5_3_4_6_8_7_5_3_4_6_8_7_5_3_                                 | 720  | 3755  |
| 66 | 16 | _408_414_405_403_410_413_407_412_417_406_377_404_409_455_401_402_ | 690  | 1050  |
| 67 | 4  | _18_129_128_126_                                                  | 682  | 2509  |
| 68 | 15 | _63_55_59_56_52_53_60_26_50_61_57_62_49_36_48_                    | 674  | 1726  |
| 69 | 6  | _103_17_34_33_1_2_                                                | 642  | 2717  |
| 70 | 10 | _10_9_12_11_16_15_14_13_10_9_                                     | 618  | 3051  |

|     |    |                                                                       |     |      |
|-----|----|-----------------------------------------------------------------------|-----|------|
| 71  | 2  | _64_67_                                                               | 585 | 2167 |
| 72  | 11 | _273_391_243_246_245_250_247_463_386_411_458_                         | 578 | 891  |
| 73  | 11 | _23_75_84_83_162_158_156_23_75_144_155_                               | 577 | 1793 |
| 74  | 2  | _191_19_                                                              | 568 | 4877 |
| 75  | 8  | _20_78_79_74_77_76_72_73_                                             | 563 | 2623 |
| 76  | 8  | _23_75_144_155_23_168_84_83_                                          | 558 | 1614 |
| 77  | 14 | _99_475_99_489_497_118_502_499_501_453_491_488_189_94_                | 494 | 716  |
| 78  | 3  | _104_104_104_                                                         | 489 | 1861 |
| 79  | 14 | _543_551_36_546_541_237_531_236_534_527_26_500_532_518_               | 481 | 669  |
| 80  | 9  | _433_559_572_469_542_579_452_480_449_                                 | 474 | 575  |
| 81  | 2  | _100_1_                                                               | 461 | 1887 |
| 82  | 15 | _55_59_56_52_53_60_26_50_61_57_62_49_36_48_71_                        | 454 | 1306 |
| 83  | 16 | _508_520_517_512_507_495_510_506_516_514_509_513_240_523_309_515_     | 450 | 673  |
| 84  | 15 | _106_105_87_86_107_22_482_474_101_481_457_134_102_98_97_              | 432 | 624  |
| 85  | 8  | _485_564_568_560_367_503_363_367_                                     | 427 | 572  |
| 86  | 4  | _92_95_85_22_                                                         | 426 | 1226 |
| 87  | 8  | _376_383_382_394_395_439_189_392_                                     | 411 | 1080 |
| 88  | 16 | _21_81_80_82_21_66_64_67_65_51_54_58_21_81_80_82_                     | 401 | 1300 |
| 89  | 18 | _10_9_12_11_16_15_14_13_10_9_12_11_16_15_14_13_10_9_                  | 369 | 1471 |
| 90  | 16 | _51_54_58_21_81_80_82_163_66_64_67_65_51_54_58_21_                    | 364 | 1146 |
| 91  | 6  | _14_13_10_9_12_11_                                                    | 363 | 2417 |
| 92  | 18 | _96_137_157_141_142_19_145_139_140_136_143_19_146_149_148_147_96_137_ | 361 | 978  |
| 93  | 4  | _205_159_161_160_                                                     | 346 | 1279 |
| 94  | 16 | _5_3_4_6_8_7_5_3_4_6_8_7_5_3_4_6_                                     | 332 | 1822 |
| 95  | 4  | _161_160_278_159_                                                     | 316 | 1081 |
| 96  | 15 | _113_101_112_122_134_102_98_97_106_105_87_86_107_22_92_               | 310 | 687  |
| 97  | 6  | _67_65_51_54_58_21_                                                   | 304 | 1410 |
| 98  | 4  | _6_8_7_5_                                                             | 294 | 2460 |
| 99  | 2  | _3_4_                                                                 | 293 | 3148 |
| 100 | 10 | _65_51_54_58_21_81_80_82_163_66_                                      | 276 | 540  |

**Table S3. Top 100 *k*-mers (putative HORs) with the highest tandem counts.** Each putative HORs is represented by a sequence of monomers from the set *AllMonomers*.

## **Bibliography**

Šošić, M., Šikić, M. (2017). Edlib: a C/C ++ library for fast, exact sequence alignment using edit distance. *Bioinformatics* 33, 1394–1395.

Compeau, P., Pevzner, P.A *Bioinformatics Algorithms: An Active Learning Approach*, 3rd edition. La Jolla, California: Active Learning Publishers, 2018.
